# Supplementary material
Source: Research Square preprint supplement (doi:10.21203/rs.3.rs-9708641/v1)
Supplement: Supplementary file 1 [file 41edaa64877bf0c26e81882d.xlsx]

## Sheet: Exp. I
Experiment ID	Date	Time	Sampling point	Model	Distance	Mean Phrase	Sum Phrases	Mean Int.	Sum int.	Time at low amp.	Num. Phrases
DR9.PM6.---	01.04.24	20:45:00	DR9	0	2	1.35258	131.2	5.92328	568.635	508.123	97
DR5.PM9.MM4	01.04.24	21:43:00	DR5	1	2	1.3929	157.398	2.99278	338.185	473.829	113
DR3.PM3.MM4	01.04.24	22:40:00	DR3	1	2	1.08637	29.3321	3.45196	89.751	119.083	27
DR4.PM9.---	02.04.24	21:16:00	DR4	0	1	1.57008	146.018	2.74138	252.207	398.224	93
DR10.PM4.MM2	03.04.24	18:36:00	DR10	1	2	0.87411	54.1948	4.14911	257.245	311.44	62
DR10.PM4.MM2	03.04.24	18:36:00	DR10	1	2	0.82255	8.2255	4.64689	41.822	14.7367	10
DR4.PM1.MM2	03.04.24	20:19:00	DR4	1	2	1.30673	88.8576	2.38249	164.392	253.249	68
DR00.PM9.MM1	05.06.25	21:14:00	DR00	1	1	1.49827	17.9792	4.81057	52.9163	70.8955	12
DR8.PM9.MM4	05.06.25	19:55:00	DR8	1	1	1.16057	60.3495	4.86002	233.281	300.747	52
DR3.PM4.---	11.07.23	22:57:00	DR3	0	1	1.29629	114.073	4.39123	373.255	487.328	88
DR6.PM6.MM4	11.07.23	21:40:00	DR6	1	2	0.895356	32.2328	4.90743	171.76	140.627	36
DR4.PM6.MM3	12.07.23	20:35:00	DR4	1	2	0.943906	32.0928	4.55698	150.38	182.473	34
DR6.PM4.MM1	13.07.23	00:30:00	DR6	1	1	0.799338	41.5656	3.61047	184.134	225.699	52
DR2.PM9.MM3	16.03.24	22:51:00	DR2	1	1	1.31512	111.785	7.08301	594.973	451.516	85
DR3.PM9.---	17.03.24	21:30:00	DR3	0	2	1.02793	38.0334	6.27138	225.77	240.95	37
DR7.PM1.---	17.06.24	21:00:00	DR7	0	2	1.5141	54.5075	3.80781	72.3483	126.856	36
DR3.PM1.---	17.06.24	22:14:00	DR3	0	2	1.19126	69.0933	3.46412	71.1089	140.202	58
DR0.PM6.---	18.06.24	21:22:00	DR0	0	2	1.39053	87.6031	3.78964	234.958	322.561	64
DR5.PM1.MM3	19.06.24	21:33:00	DR5	1	2	1.42616	82.7175	3.13385	184.897	267.615	58
DR9.PM1.---	22.04.24	19:40:00	DR9	0	2	1.3434	182.702	3.2463	438.25	620.952	136
DR5.PM3.MM1	22.04.24	21:22:00	DR5	1	2	1.35313	67.6564	2.49481	122.246	189.902	50
DR0.PM9.MM1	22.04.24	23:45:00	DR0	1	2	1.19171	79.8444	3.99988	143.793	223.637	67
DR3.PM4.MM2	22.04.24	22:10:00	DR3	1	2	0.99566	34.8481	5.18737	176.371	211.219	35
DR4.PM4.---2	23.06.25	19:04:00	DR4	0	2	1.23225	43.1287	3.70926	126.115	169.46	35
DR10.PM4.---	24.04.24	19:50:00	DR10	0	1	1.23784	113.881	3.54111	336.406	432.828	92
DR03.PM1.---2	24.06.25	19:40:00	DR3	0	2	1.30842	86.3556	3.05147	195.294	287.126	66

## Sheet: Exp. II
Date	Time	Sampling point	Stimulus	Outcome
31.07.2025	22:32:00	DR10	Control	Singing
01.08.2025	21:35:00	DR8	Control	Singing
01.08.2025	23:00:00	DR9	Control	Singing
05.06.2025	19:55:00	DR8	Control	Singing
05.05.2026	20:13:00	DR9	Control	Singing
07.05.2026	18:05:00	DR9	Control	Silence
31.07.2025	20:58:00	DR9	Low amp. PB	Silence
01.08.2025	22:18:00	DR10	Low amp. PB	Silence
04.06.2025	18:49:00	DR9	Low amp. PB	Silence
06.05.2026	19:25:00	DR6	Low amp. PB	Silence
06.05.2026	20:46:00	DR2	Low amp. PB	Silence
06.05.2026	21:51:00	DR9	Low amp. PB	Silence
