# Supplementary material
Source: Research Square preprint supplement (doi:10.21203/rs.3.rs-9708641/v1)
Supplement: Supplementary file 1 [file 87b998ee298680e76e4bf7db.pdf]

SUPPLEMENTARY INFORMATION

**Whispers in the night: an experimental approach to understanding  
low-amplitude signalling in tropical screech-owls**

Luis Felipe Peixoto, Luiz P. Gonzaga, Paulo C. Paiva, Fábio Hepp

**Table S1** Pearson correlation coefficients among the three response variables used in mixed-model analyses of experiment I ( $n = 26$  trials)

|                        | Number of phrases | Mean phrase duration | Mean interval duration |
|------------------------|-------------------|----------------------|------------------------|
| Number of phrases      | 1.00              |                      |                        |
| Mean phrase duration   | 0.43              | 1.00                 |                        |
| Mean interval duration | -0.20             | -0.29                | 1.00                   |

**Table S2** Results of the supplementary linear mixed-effects model on the first principal component (PC1) of the three response variables analysed in experiment I (Number of phrases, Mean phrase duration, Mean interval duration). PC1 was used as a composite measure of low-amplitude signalling effort. Trial type (audio only vs audio+mount) was the fixed effect, with sampling point included as a random intercept ( $n = 26$  trials at 11 sampling points). PC1 (53.9% of variance) loadings: Number of phrases = 0.595, Mean phrase duration = 0.639, Mean interval duration = -0.488 (signs inverted for interpretability). Coefficients are reported relative to the reference level "audio+mount"; degrees of freedom were estimated using the Satterthwaite approximation

| Fixed effect            | Estimate ( $\beta$ ) | SE    | df    | $t$   | $P$   |
|-------------------------|----------------------|-------|-------|-------|-------|
| Intercept               | -0.461               | 0.335 | 16.33 | -1.38 | 0.187 |
| Trial type [audio only] | 1.195                | 0.450 | 23.44 | 2.66  | 0.014 |
